# Supplementary material for: Neuronal-Derived EV Biomarkers Track Cognitive Decline in Alzheimer’s Disease
Source: MDPI journal article supplement (doi:10.3390/cells11030436), 2022-01-27

**Supplementary Figure S1.** Associations of cognitive scores with NDEV tetraspanin-scaled p181-Tau levels

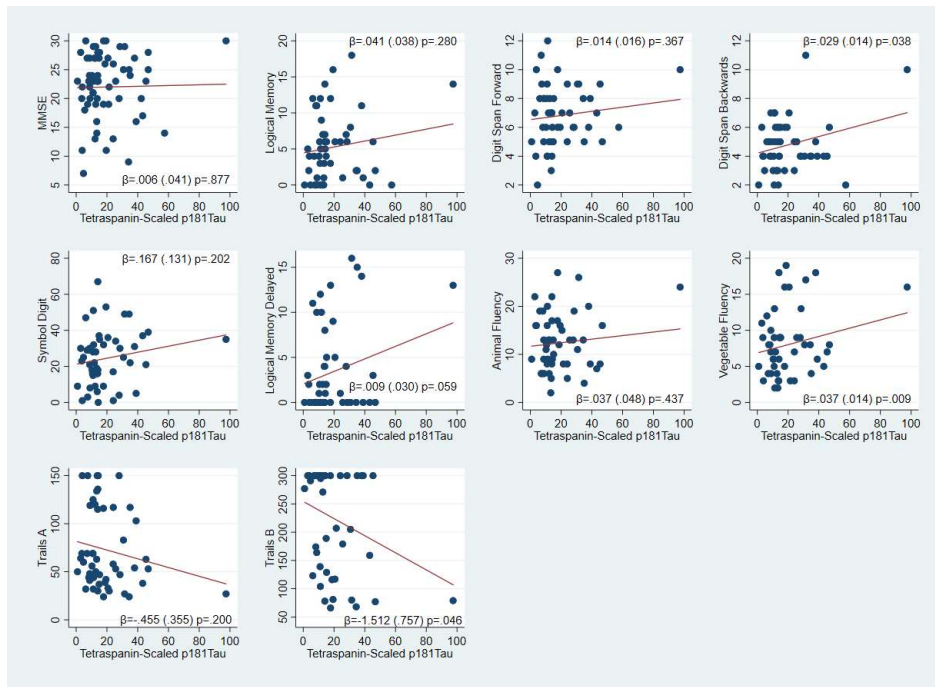

**Supplementary Figure S2.** Associations of cognitive scores with NDEV tetraspanin-scaled total Tau levels

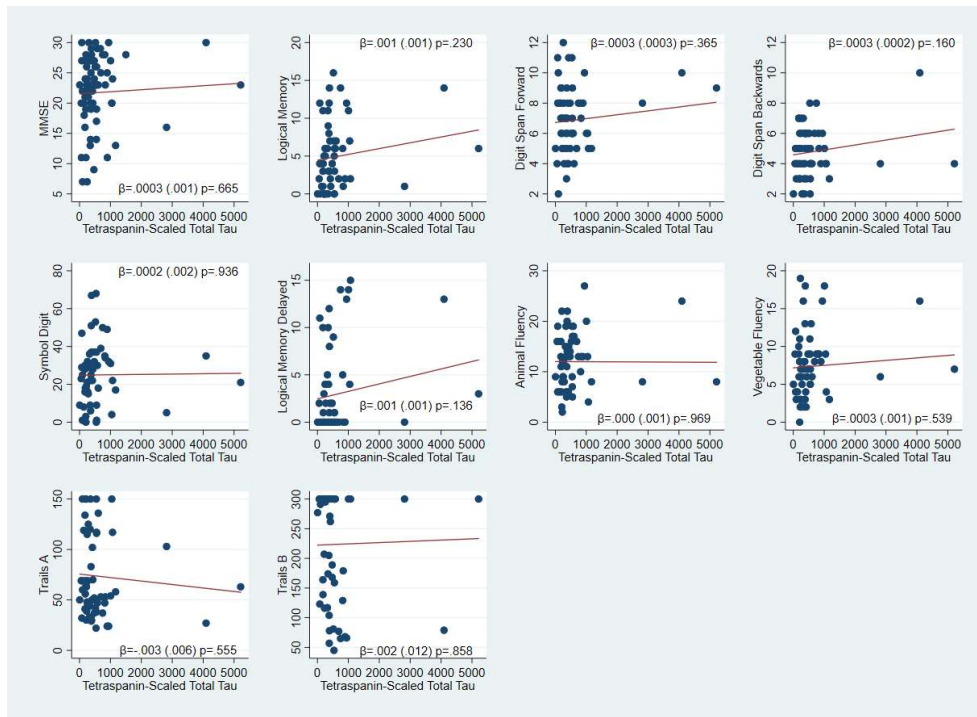

**Supplementary Figure S3.** Associations of cognitive scores with NDEV tetraspanin-scaled p181-Tau/ $A\beta_{42}$  Ratios

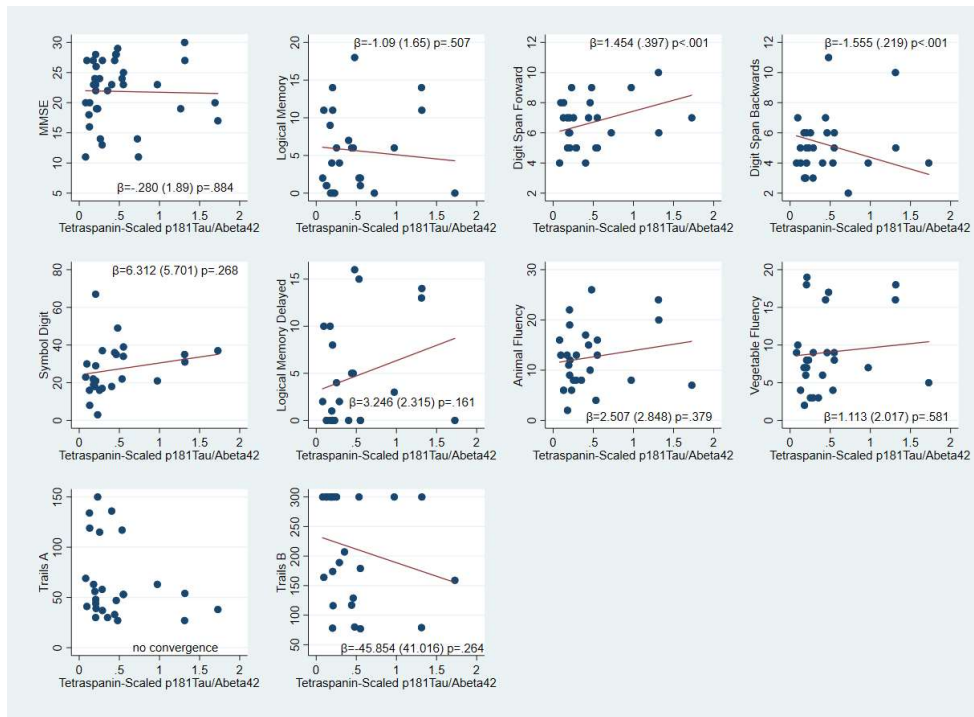

**Supplementary Figure S4.** Associations of cognitive scores with NDEV tetraspanin-scaled total Tau/ $A\beta_{42}$  Ratios

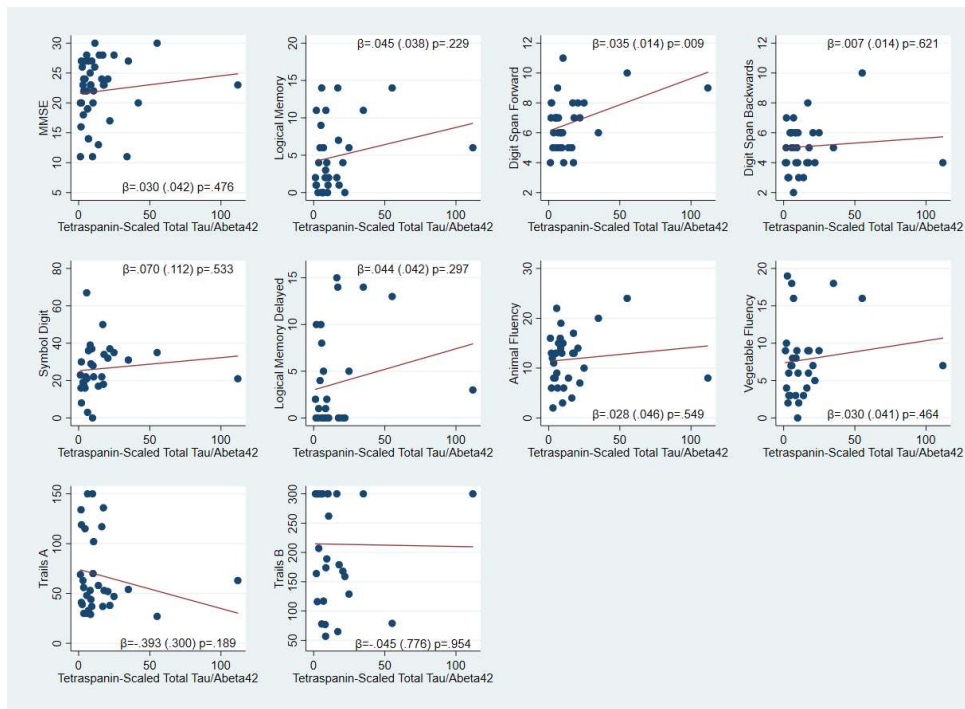

**Supplementary Figure S5.** Associations of cognitive scores with NDEV tetraspanin-scaled Synaptophysin levels

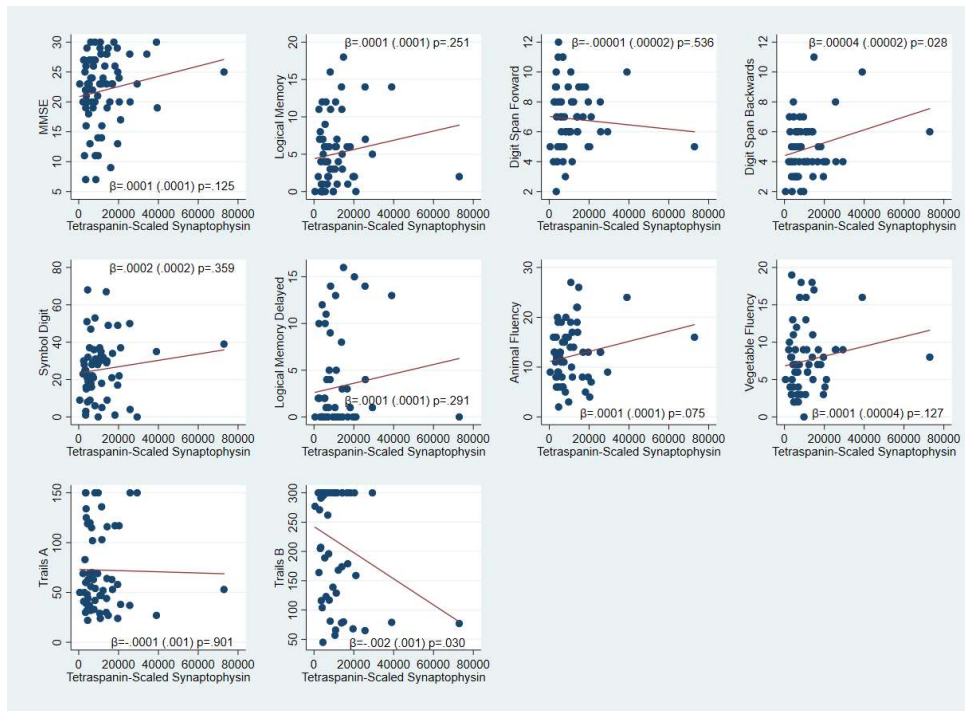

**Supplementary Figure S6.** Associations of cognitive scores with NDEV tetraspanin-scaled Synaptopodin levels

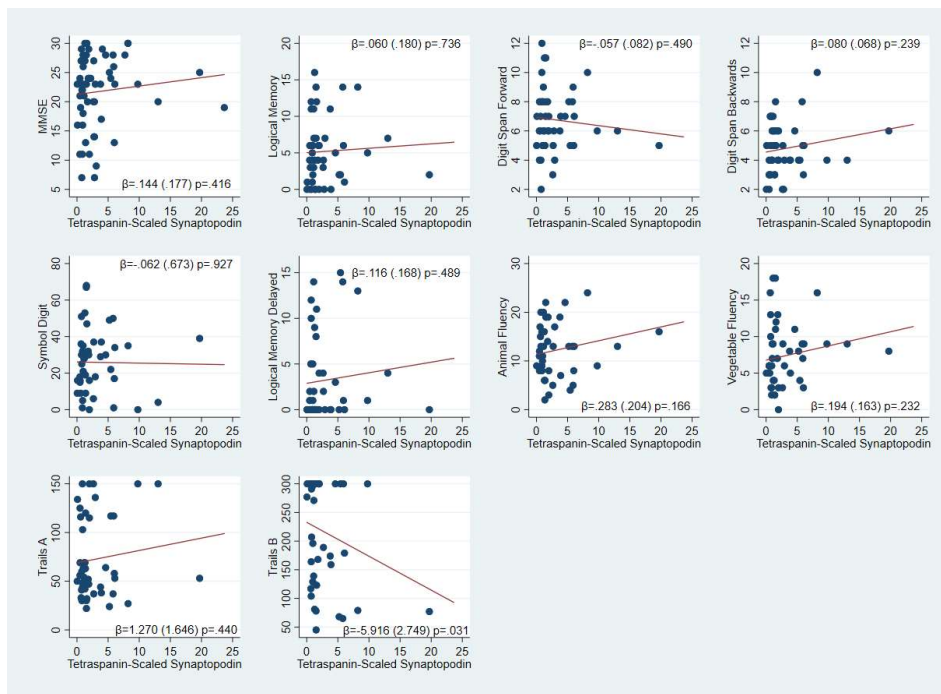

Supplement: s1 [file s1]
